# Supplementary material for: Mechanism studies of addition reactions between the pyrimidine type radicals and their 3′/5′ neighboring deoxyguanosines
Source: Royal Society of Chemistry journal article supplement (doi:10.1039/c7ra12713h), 2018-01-01
Supplement: c7ra12713h1.pdf [file c7ra12713h1.pdf]

## Electronic Supplementary Information

### Mechanism studies of addition reactions between the pyrimidine type radicals and their 3'/5' neighboring deoxyguanosines

Shoushan Wang<sup>a, b</sup>, Min Zhang<sup>b</sup>, Peng Liu<sup>b</sup>, Shilei Xie<sup>b</sup>, Faliang Cheng<sup>b,\*</sup>, Lishi Wang<sup>a,\*</sup>

<sup>a</sup> School of Chemistry and Chemical Engineering, South China University of Technology, Guangzhou 510641, People's Republic of China.

<sup>b</sup> Guangdong Engineering and Technology Research Center for Advanced Nanomaterials, School of Environment and Civil Engineering, Dongguan University of Technology, Dongguan 523808, People's Republic of China.

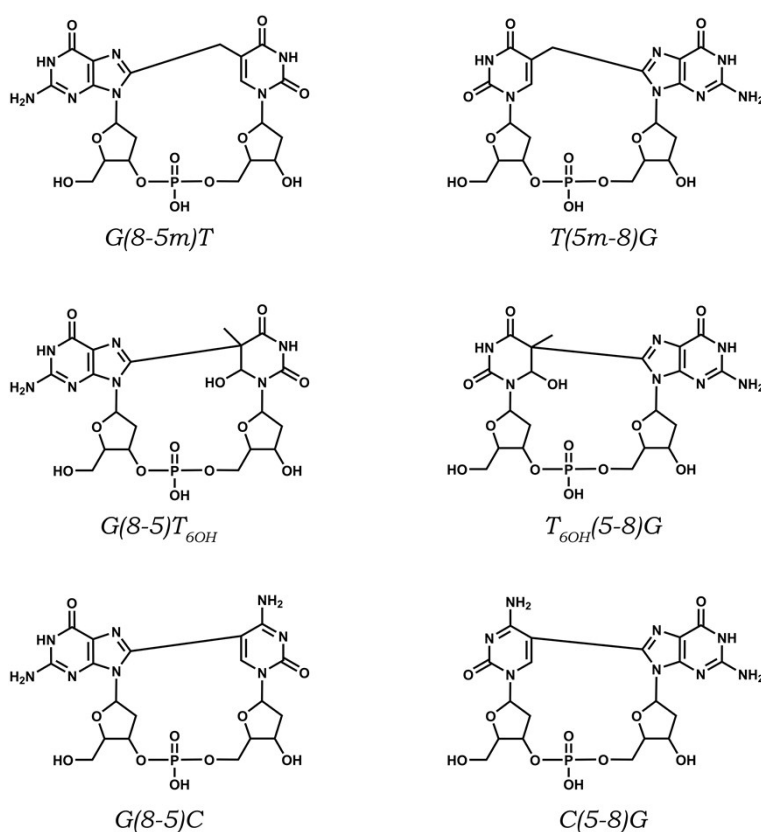

**Figure S1** Prototype structures of the six related closed-shell DNA intrastrand cross-links.

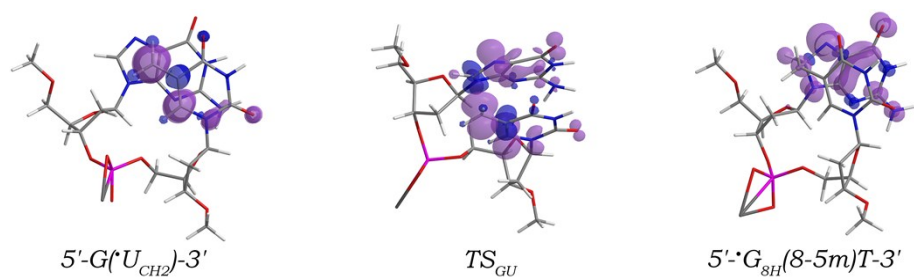

**Figure S2** Spin density distributions of stationary points along the reaction path of the  $\cdot\text{U}_{\text{CH}_2}$  radical addition to the  $\text{C}_8$  site of its 5' neighboring deoxyguanosine.

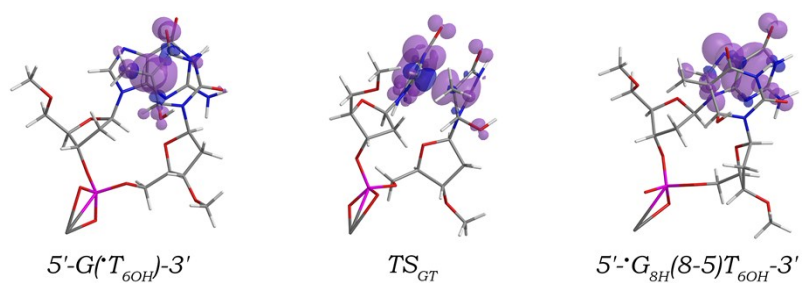

**Figure S3** Spin density distributions of stationary points along the reaction path of the  $\cdot\text{T}_{6\text{OH}}$  radical addition to the  $\text{C}_8$  site of its 5' neighboring deoxyguanosine.

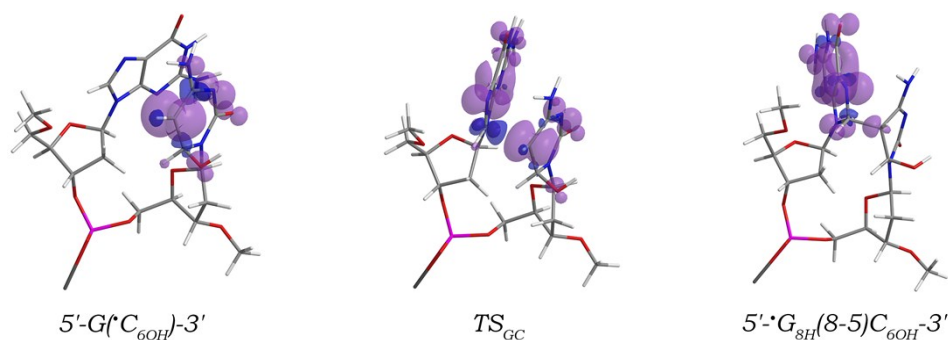

**Figure S4** Spin density distributions of stationary points along the reaction path of the  $\cdot\text{C}_{6\text{OH}}$  radical addition to the  $\text{C}_8$  site of its 5' neighboring deoxyguanosine.

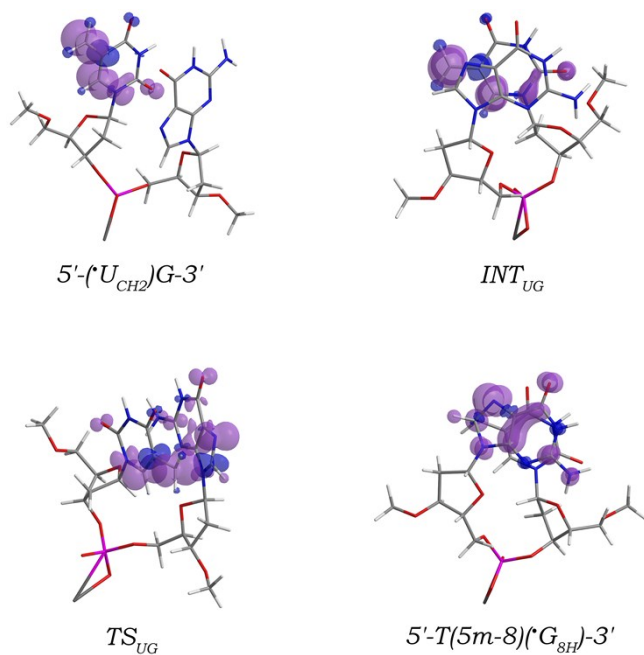

**Figure S5** Spin density distributions of stationary points along the reaction path of the  $\cdot U_{CH_2}$  radical addition to the  $C_8$  site of its 3' neighboring deoxyguanosine.

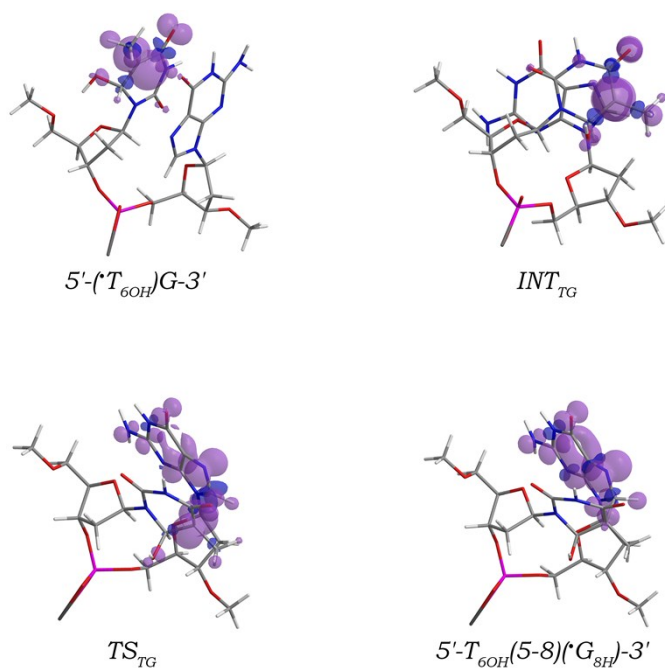

**Figure S6** Spin density distributions of stationary points along the reaction path of the  $\cdot T_{6OH}$  radical addition to the  $C_8$  site of its 3' neighboring deoxyguanosine.

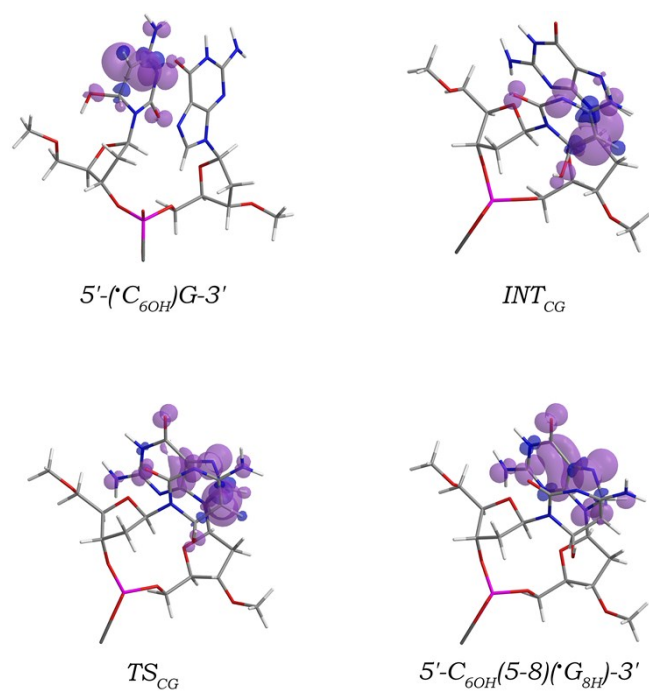

**Figure S7** Spin density distributions of stationary points along the reaction path of the  $\cdot\text{C}_{6\text{OH}}$  radical addition to the  $\text{C}_8$  site of its 3' neighboring deoxyguanosine.

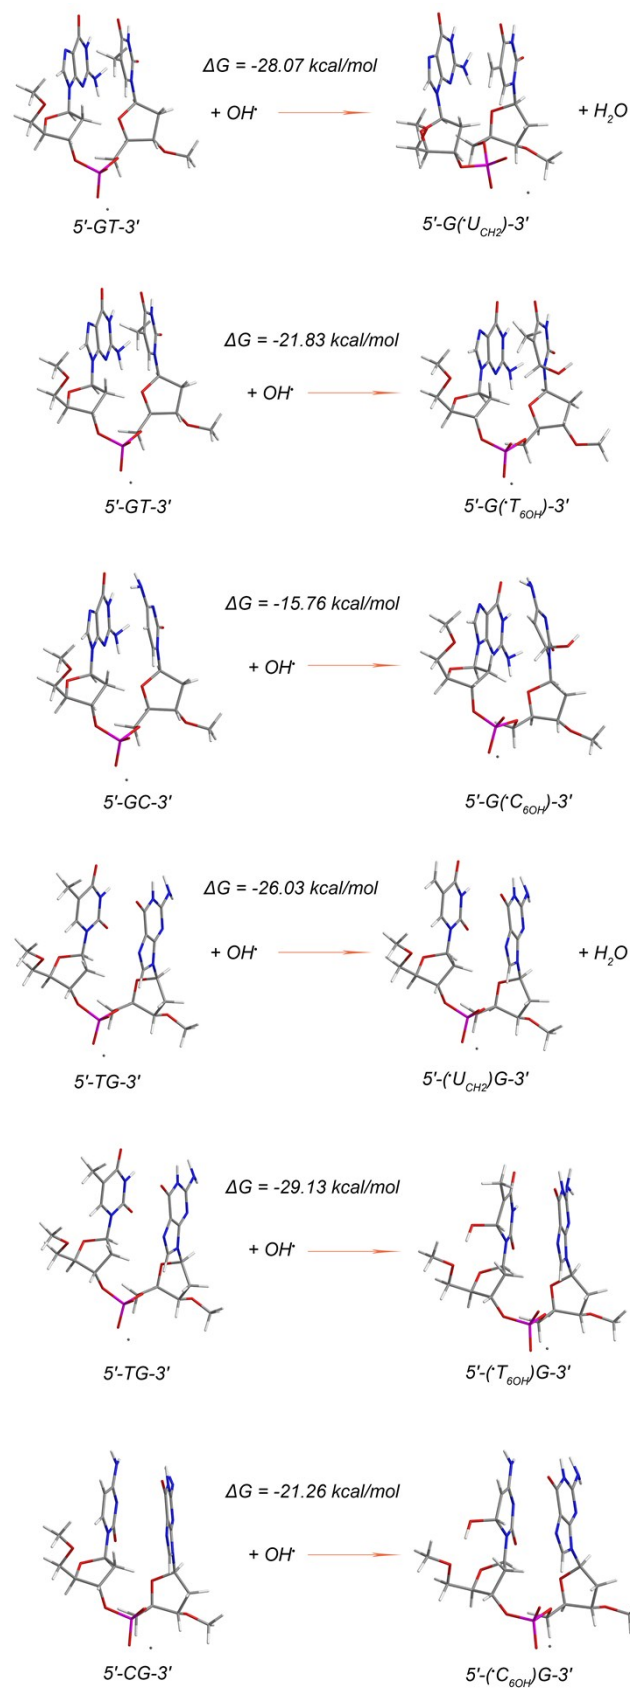

**Figure S8** Reaction free energies calculated for the OH<sup>•</sup> radical reacting with the canonical 5'-GT-3', 5'-GC-3', 5'-TG-3', and 5'-CG-3' sequences forming the 5'-G(U<sub>CH2</sub>)-3', 5'-G(T<sub>60H</sub>)-3', 5'-G(C<sub>60H</sub>)-3', 5'-(U<sub>CH2</sub>)G-3', 5'-(T<sub>60H</sub>)G-3', and 5'-(C<sub>60H</sub>)G-3' sequences, respectively.

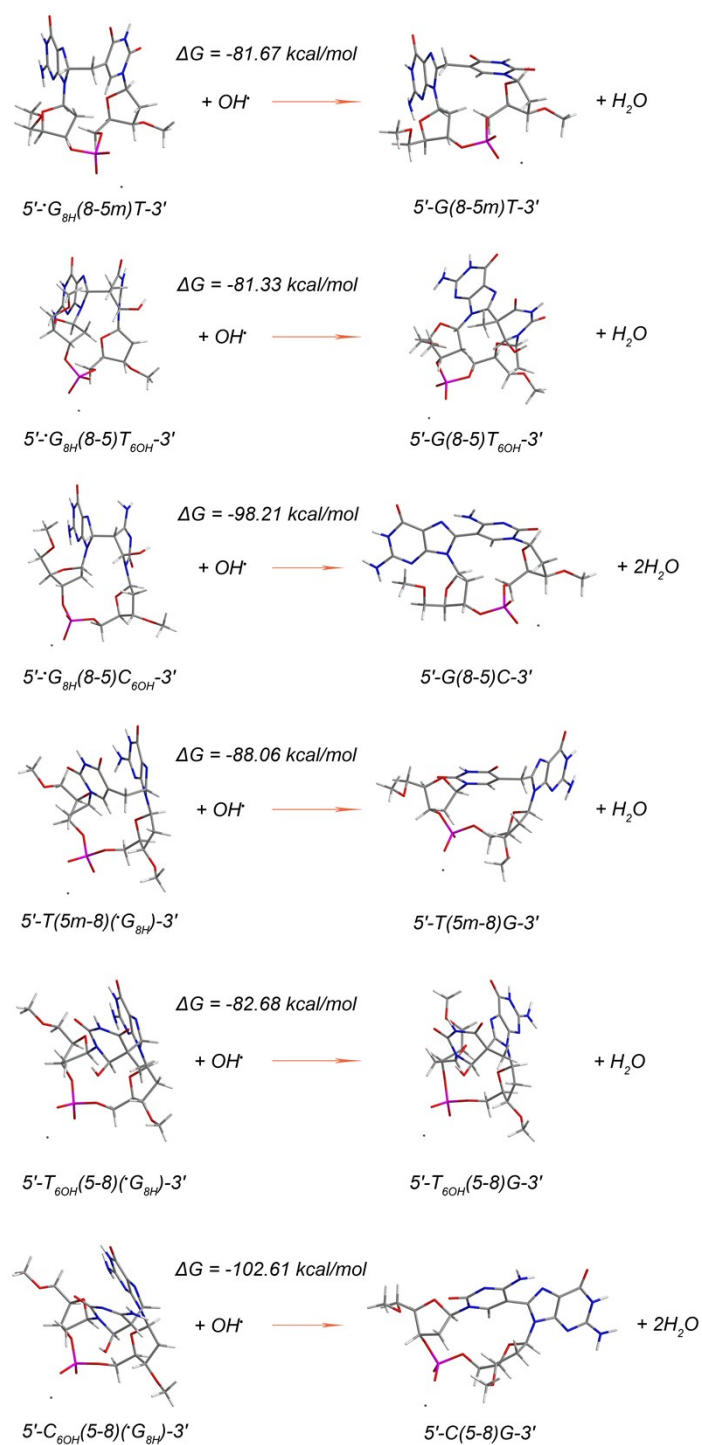

**Figure S9** Reaction free energies calculated for formation of the closed-shell 5'-G(8-5m)T-3', 5'-G(8-5)T<sub>6OH</sub>-3', 5'-G(8-5)C-3', 5'-T(5m-8)G-3', 5'-T<sub>6OH</sub>(5-8)G-3', and 5'-C(5-8)G-3' intrastrand cross-links starting from the radical adducts, 5'- $\dot{\text{G}}_{8\text{H}}$ (8-5m)T-3', 5'- $\dot{\text{G}}_{8\text{H}}$ (8-5)T<sub>6OH</sub>-3', 5'- $\dot{\text{G}}_{8\text{H}}$ (8-5)C<sub>6OH</sub>-3', 5'-T(5m-8)( $\dot{\text{G}}_{8\text{H}}$ )-3', 5'-T<sub>6OH</sub>(5-8)( $\dot{\text{G}}_{8\text{H}}$ )-3', and 5'-C<sub>6OH</sub>(5-8)( $\dot{\text{G}}_{8\text{H}}$ )-3', respectively.
